# Supplementary figures and images for: First Glimpse at the Diverse Aquaporins of Amphipod Crustaceans
Source: MDPI journal article supplement (doi:10.3390/cells10123417), 2021-12-04

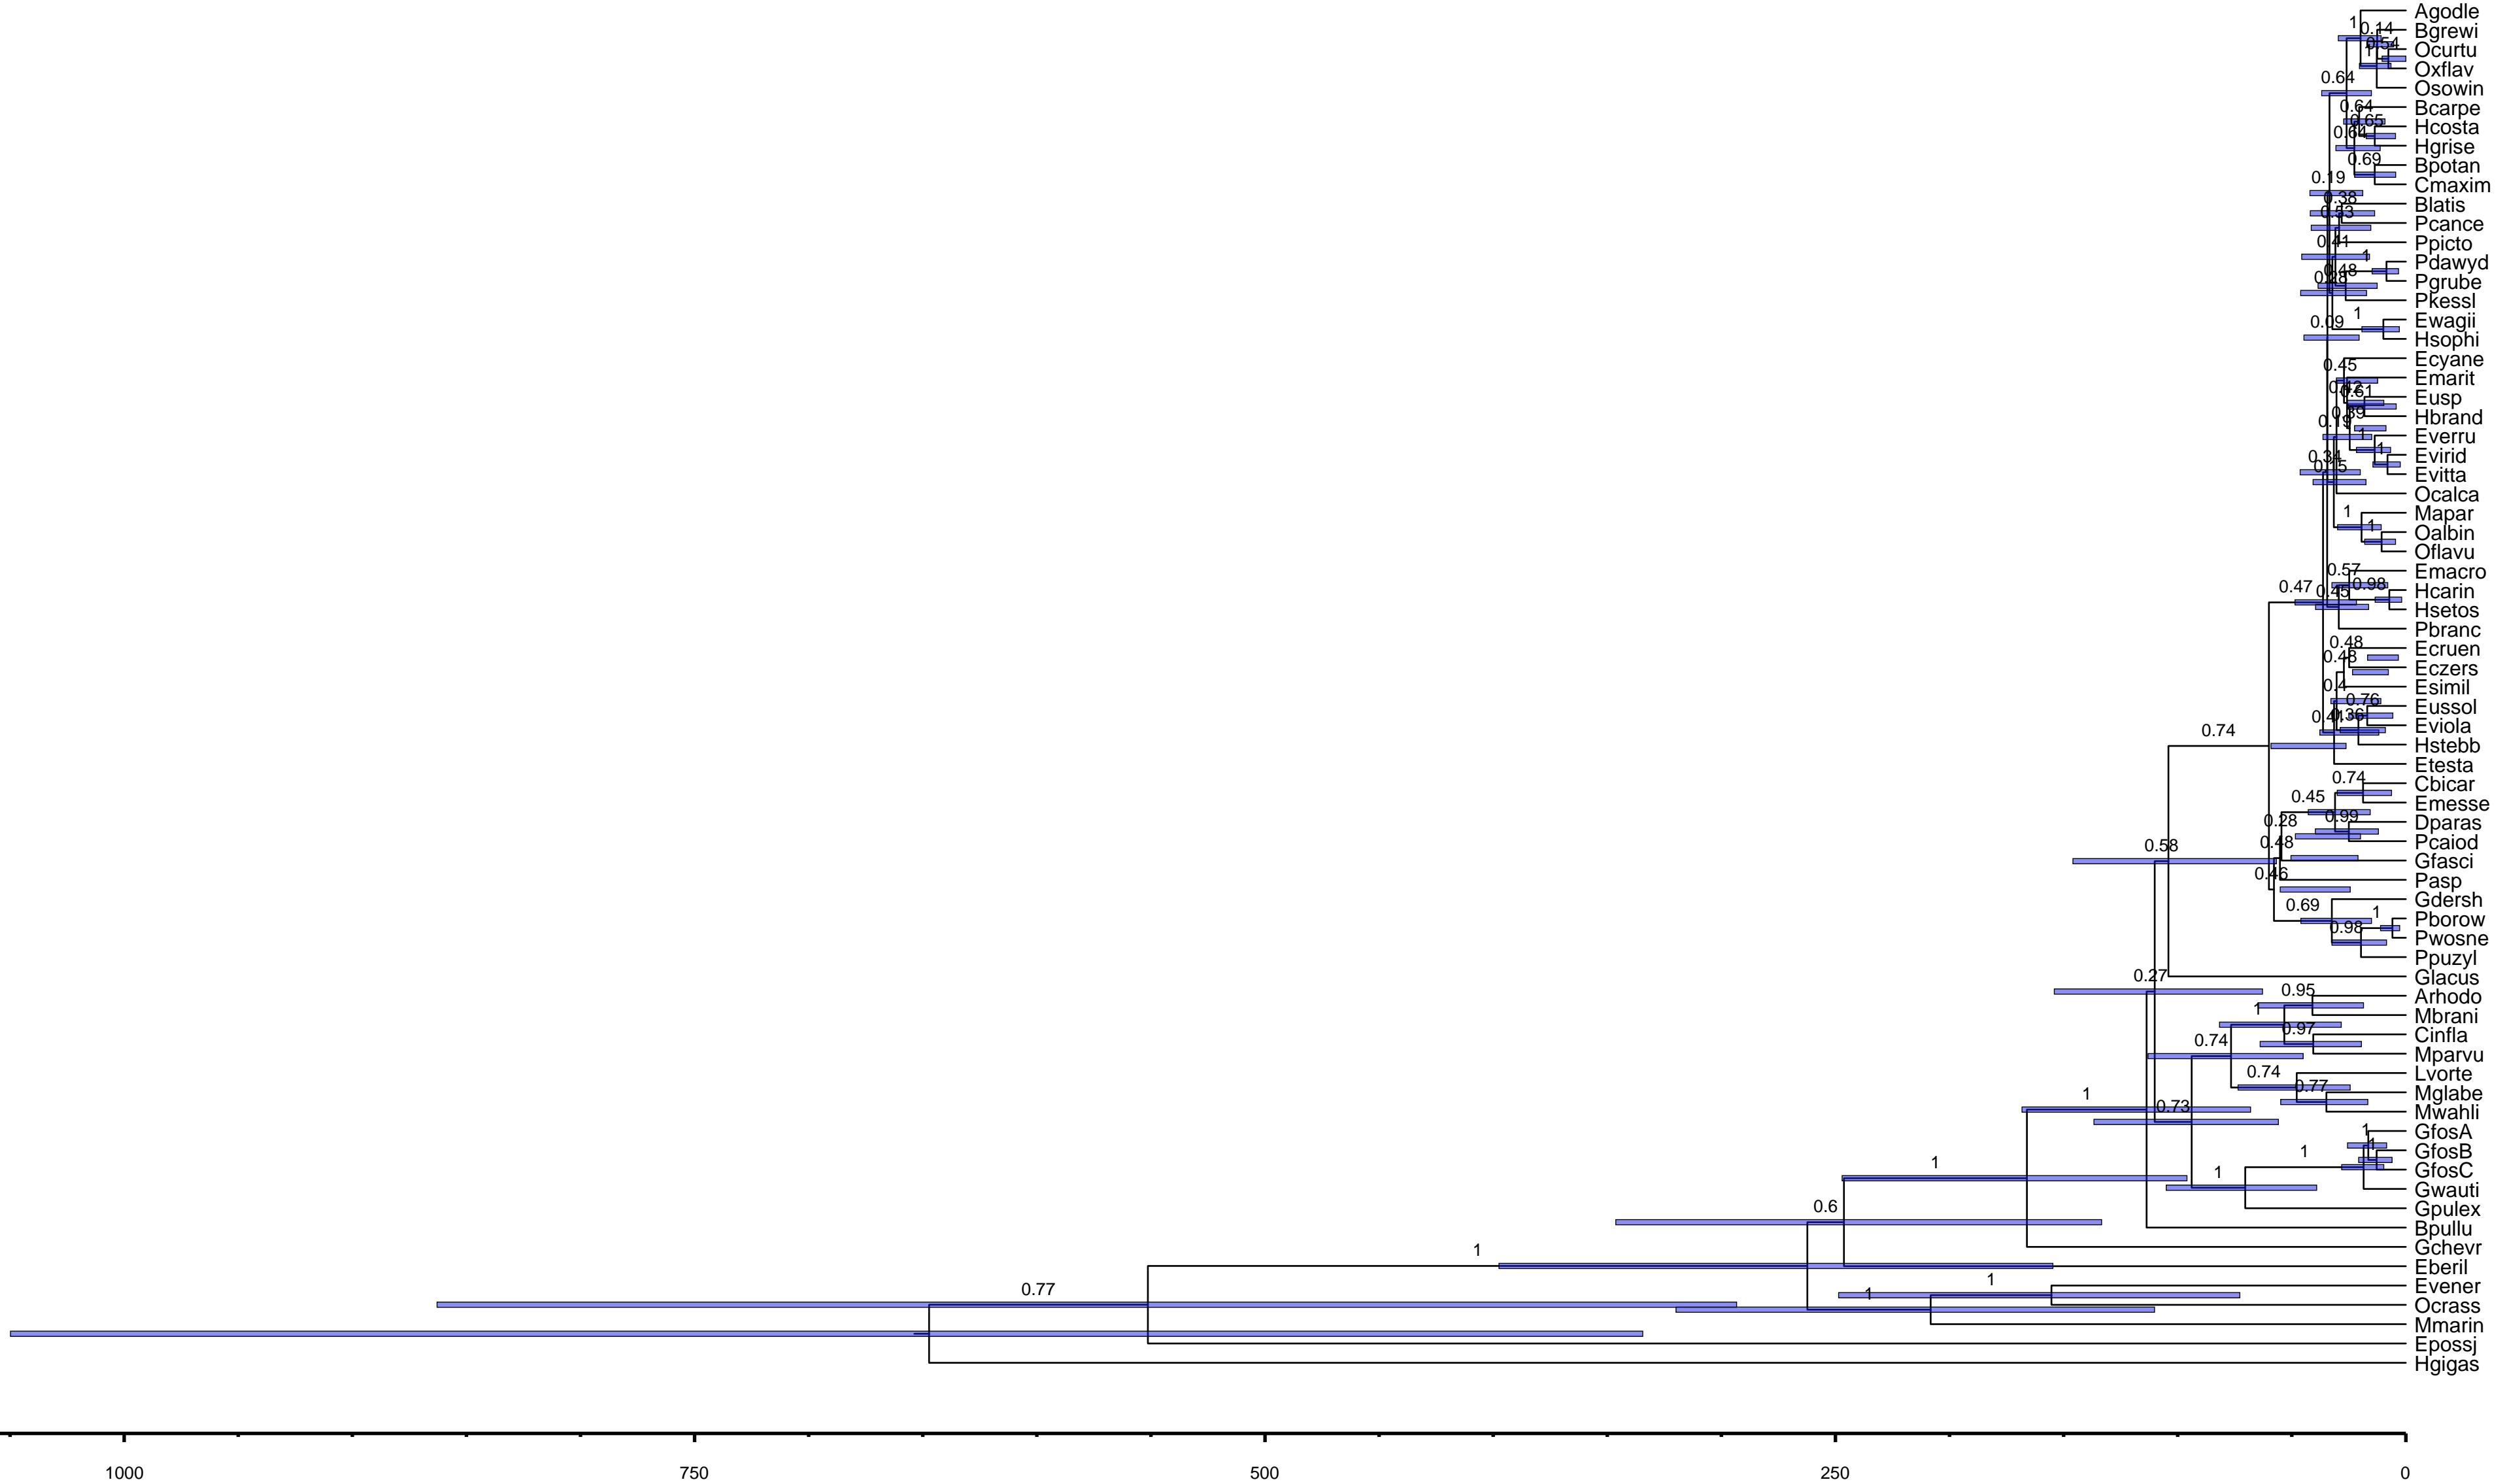

Supplement: s1 [file s1]
